# Supplementary material for: Impact of Metallic Nanoparticles on In Vitro Culture, Phenolic Profile and Biological Activity of Two Mediterranean Lamiaceae Species: Lavandula viridis L’Hér and Thymus lotocephalus G. López and R. Morales
Source: MDPI journal article supplement (doi:10.3390/molecules26216427), 2021-10-25
Supplement: s1 [file s1]

## Supplementary information

**Table S1.** HPLC-HR-MS data of identified phenolic compounds from *Lavandula viridis* L'Hér and *Thymus lotocephalus* G. Lopez & R. Morales extracts.

| Peak | Compound identity                          | Chemical formula                                | Theoretical exact mass [M-H] <sup>-</sup> (m/z) | Delta ppm (error) | RT (min) | MSI MI level* |
|------|--------------------------------------------|-------------------------------------------------|-------------------------------------------------|-------------------|----------|---------------|
| 1    | O-Caffeoylquinic acid <sup>a</sup>         | C <sub>16</sub> H <sub>18</sub> O <sub>9</sub>  | 353.0867                                        | 2.103             | 1.48     | 2             |
| 2    | Caffeic acid hexoside <sup>a</sup>         | C <sub>15</sub> H <sub>18</sub> O <sub>9</sub>  | 341.0867                                        | -0.007            | 2.9      | 2             |
| 3    | Caffeic acid hexoside <sup>a</sup>         | C <sub>15</sub> H <sub>18</sub> O <sub>9</sub>  | 341.0867                                        | 0.143             | 3.5      | 2             |
| 4    | Fertaric acid <sup>a</sup>                 | C <sub>14</sub> H <sub>14</sub> O <sub>9</sub>  | 325.0557                                        | 0.774             | 4.23     | 2             |
| 5    | Caffeic acid <sup>a</sup>                  | C <sub>9</sub> H <sub>8</sub> O <sub>4</sub>    | 179.0338                                        | -0.604            | 4.59     | 1             |
| 6    | Ferulic acid <sup>a</sup>                  | C <sub>10</sub> H <sub>10</sub> O <sub>4</sub>  | 193.0495                                        | -0.374            | 7.59     | 1             |
| 7    | Luteolin-7-O-glucuronide <sup>c</sup>      | C <sub>21</sub> H <sub>18</sub> O <sub>12</sub> | 461.0714                                        | 0.569             | 8.11     | 2             |
| 8    | Rosmarinic acid <sup>a</sup>               | C <sub>18</sub> H <sub>16</sub> O <sub>8</sub>  | 359.0761                                        | 0.488             | 9.57     | 1             |
| 9    | Salvianolic acid A isomer I <sup>a</sup>   | C <sub>26</sub> H <sub>22</sub> O <sub>10</sub> | 493.1129                                        | 0.508             | 10.11    | 2             |
| 10   | Salvianolic acid A isomer II <sup>a</sup>  | C <sub>26</sub> H <sub>22</sub> O <sub>10</sub> | 493.1129                                        | 0.358             | 10.97    | 2             |
| 11   | Salvianolic acid I <sup>a</sup>            | C <sub>27</sub> H <sub>22</sub> O <sub>12</sub> | 537.1027                                        | 1.499             | 11.13    | 2             |
| 12   | Salvianolic acid B <sup>a</sup>            | C <sub>36</sub> H <sub>30</sub> O <sub>16</sub> | 717.1450                                        | -0.049            | 11.23    | 2             |
| 13   | Herniarin <sup>b</sup>                     | C <sub>10</sub> H <sub>8</sub> O <sub>3</sub>   | 175.0389                                        | -0.429            | 12.14    | 2             |
| 14   | Salvianolic acid A isomer III <sup>a</sup> | C <sub>26</sub> H <sub>22</sub> O <sub>10</sub> | 493.1129                                        | -0.132            | 12.8     | 2             |
| 15   | Apigenin <sup>c</sup>                      | C <sub>15</sub> H <sub>10</sub> O <sub>5</sub>  | 269.0444                                        | 0.172             | 14.8     | 1             |

Class of compounds: Phenolic acids (<sup>a</sup>Hydroxycinnamic acids); <sup>b</sup>Coumarin derivative; Flavonoids (<sup>c</sup>Flavones).

\*Metabolite standards initiative metabolite identification (MSI MI) levels. Reference standards were available for all compounds identified at MSI MI level 1.

**Table S2.** Summary of HPLC-HR-MS parameters for quantification of phenolic compounds in *Lavandula viridis* L'Hér and *Thymus lotocephalus* G. Lopez & R. Morales extracts.

| Compound                | Linear range<br>(mg/L) | Intercept | Slope   | R <sup>2</sup> | LOD<br>(mg/mL) | LOQ<br>(mg/mL) |
|-------------------------|------------------------|-----------|---------|----------------|----------------|----------------|
| Rosmarinic acid         | 0.1-100                | -103410   | 1598747 | 0.9992         | 0.06           | 0.19           |
| Caffeic acid            | 0.1-10                 | 1436398   | 3950274 | 0.9990         | 0.50           | 1.68           |
| Ferulic acid            | 0.2-60                 | 2487      | 9717    | 0.9995         | 0.37           | 1.25           |
| Gallic acid             | 0.2-15                 | -330994   | 2547719 | 0.9998         | 0.00           | 0.01           |
| Chlorogenic acid        | 0.2-15                 | -243627   | 1363025 | 0.9993         | 0.00           | 0.01           |
| Luteolin                | 0.2-15                 | 1464030   | 5454860 | 0.9990         | 0.29           | 0.96           |
| Apigenin                | 0.2-15                 | 185082    | 6649959 | 0.9995         | 0.00           | 0.01           |
| Naringenin              | 0.2-15                 | -314843   | 2143048 | 0.9996         | 0.37           | 1.23           |
| <i>p</i> -Coumaric acid | 0.2-15                 | -2024     | 73034   | 0.9999         | 0.22           | 0.72           |
